# Supplementary material for: Deletion of Nedd4-2 results in progressive kidney disease in mice
Source: PubMed Central journal article supplement — Cell Death Differ. 2017 Sep 1;24(12):2150–60. doi: 10.1038/cdd.2017.137 (PMC5686353; doi:10.1038/cdd.2017.137), 2017-09-01
Supplement: cdd2017137x1.pdf [file cdd2017137x1.pdf]

# Supplementary figures

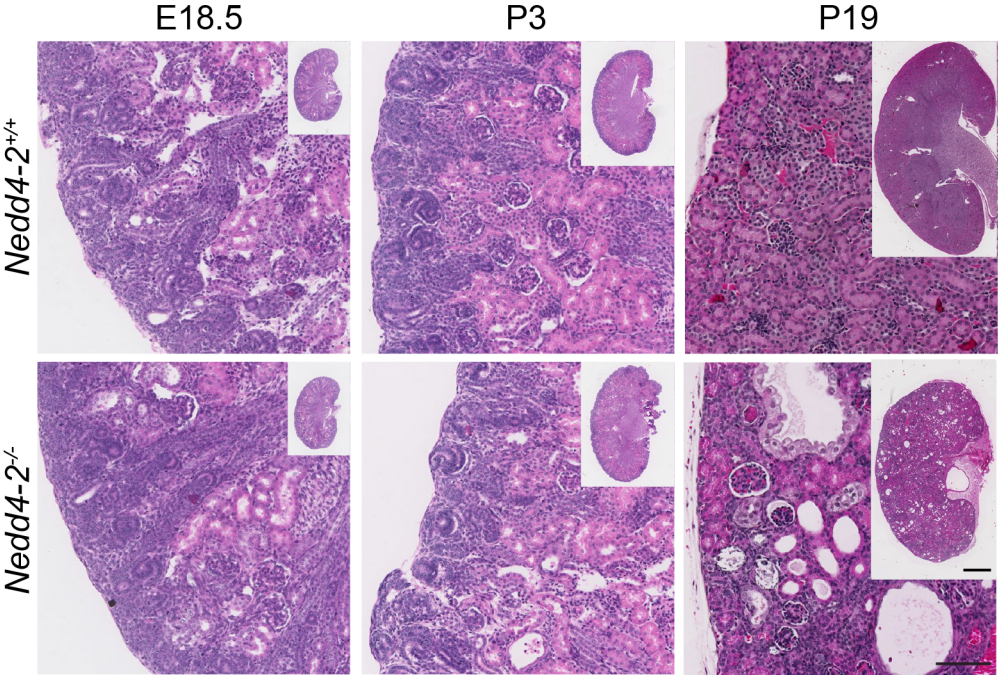

**Figure S1.** Progressive kidney disease in *Nedd4-2<sup>-/-</sup>* mice. H & E staining shows normal histology at E18.5 with signs of kidney damage first apparent at P3 in *Nedd4-2<sup>-/-</sup>* mice. The kidney pathology becomes more pronounced at P19 with dilated tubules and a disorganized structure. Scale bars: 100  $\mu\text{m}$  (inset = 1 mm).

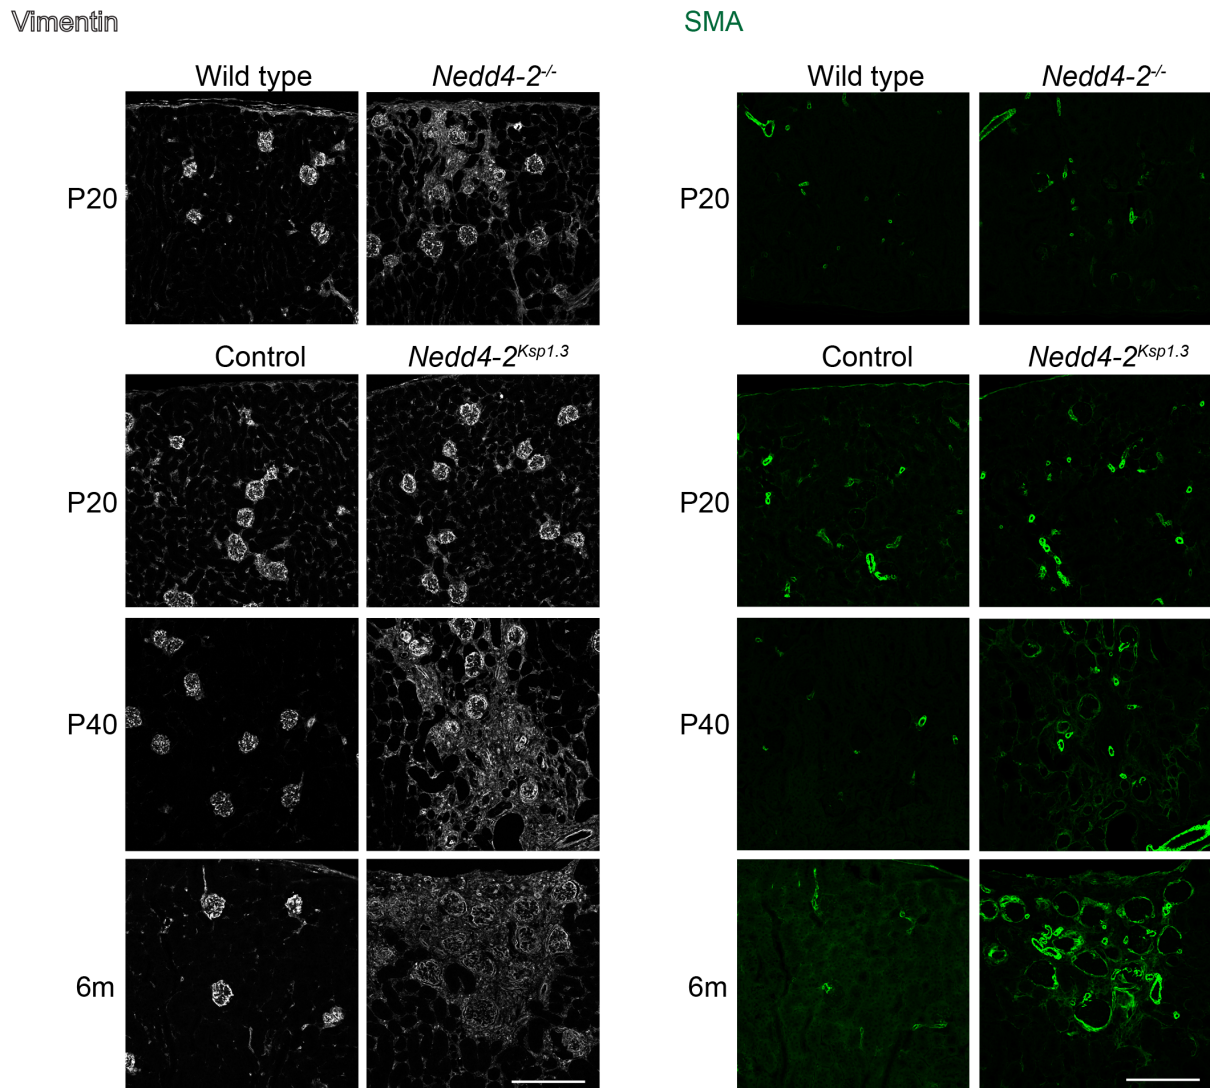

**Figure S2.** Disease progression in *Nedd4-2*<sup>Ksp1.3</sup> kidneys demonstrated by increasing expression of markers of kidney injury, vimentin and SMA. Immunohistochemistry of vimentin (white) and SMA (green) at P20 in *Nedd4-2*<sup>-/-</sup> kidneys are roughly equivalent to expression levels of these markers at P40 in *Nedd4-2*<sup>Ksp1.3</sup> kidneys. There is further increase in kidney damage at 6m of age. Scale bars: 100  $\mu$ m.

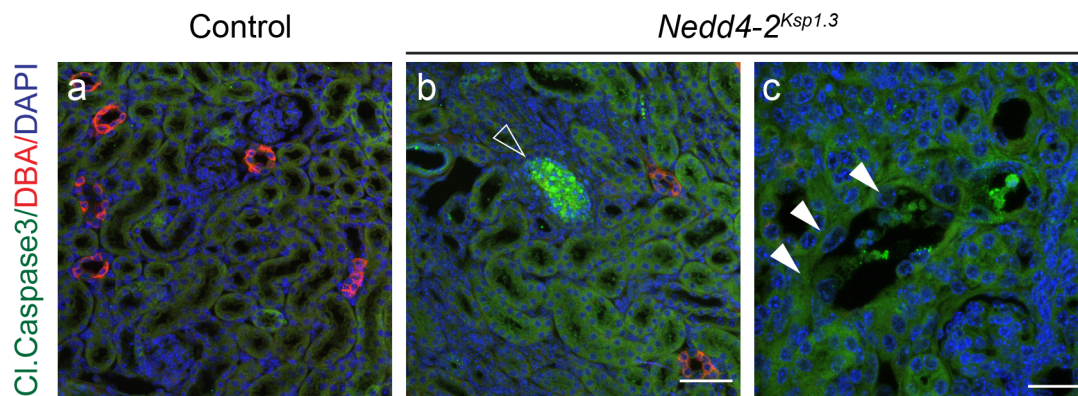

**Figure S3.** Increased cleaved caspase-3 staining in *Nedd4-2* KO mice at P20. (a) Very few positive cleaved caspase-3 cells (green) are seen in control kidneys at P20. In *Nedd4-2*<sup>Ksp1.3</sup> kidneys, cleaved caspase-3-positive cells can be seen within tubule lumens (b, empty arrow head) and in the cells lining the tubules (c). Scale bars: a and b = 50  $\mu$ m, c = 25  $\mu$ m. Arrowhead shows enlarged nuclei in tubule epithelium.

**Supplementary Table 1.** Primers used for qPCR. All primers were designed to amplify the mouse sequences.

| <b>Gene</b>                                                     | <b>Primer sequence (5'-3')</b>                         |
|-----------------------------------------------------------------|--------------------------------------------------------|
| Collagen-1 ( <i>Coll1</i> )                                     | F: CGGAGAAGAAGGAAAACGAGGAG<br>R: CACCATCAGCACCAGGGAAAC |
| Vimentin ( <i>Vim</i> )                                         | F: CGGCTGCGAGAGAAATTGC<br>R: CCACTTCCGTTCAAGGTCAAG     |
| $\alpha$ -smooth muscle actin ( <i><math>\alpha</math>SMA</i> ) | F: CCCAGACATCAGGGAGTAATGG<br>R: TCTATCGGATACTTCAGCGTCA |
| Kidney injury molecule 1 ( <i>KIM-1</i> )                       | F: TGGTTGCCTTCCGTGTCTCT<br>R: TCAGCTCGGGAATGCACAA      |
| TATA-box binding protein ( <i>TBP</i> )                         | F: CAAACCCAGAATTGTTCTCCTT<br>R: ATGTGGTCTTCCTGAATCCCT  |
